# Supplementary figures and images for: The Oxysterol Synthesising Enzyme CH25H Contributes to the Development of Intestinal Fibrosis
Source: PubMed Central journal article supplement — J Crohns Colitis. 2019 Apr 11;13(9):1186–200. doi: 10.1093/ecco-jcc/jjz039 (PMC6751338; doi:10.1093/ecco-jcc/jjz039), 2019-04-11

**Figure S1**

**A**

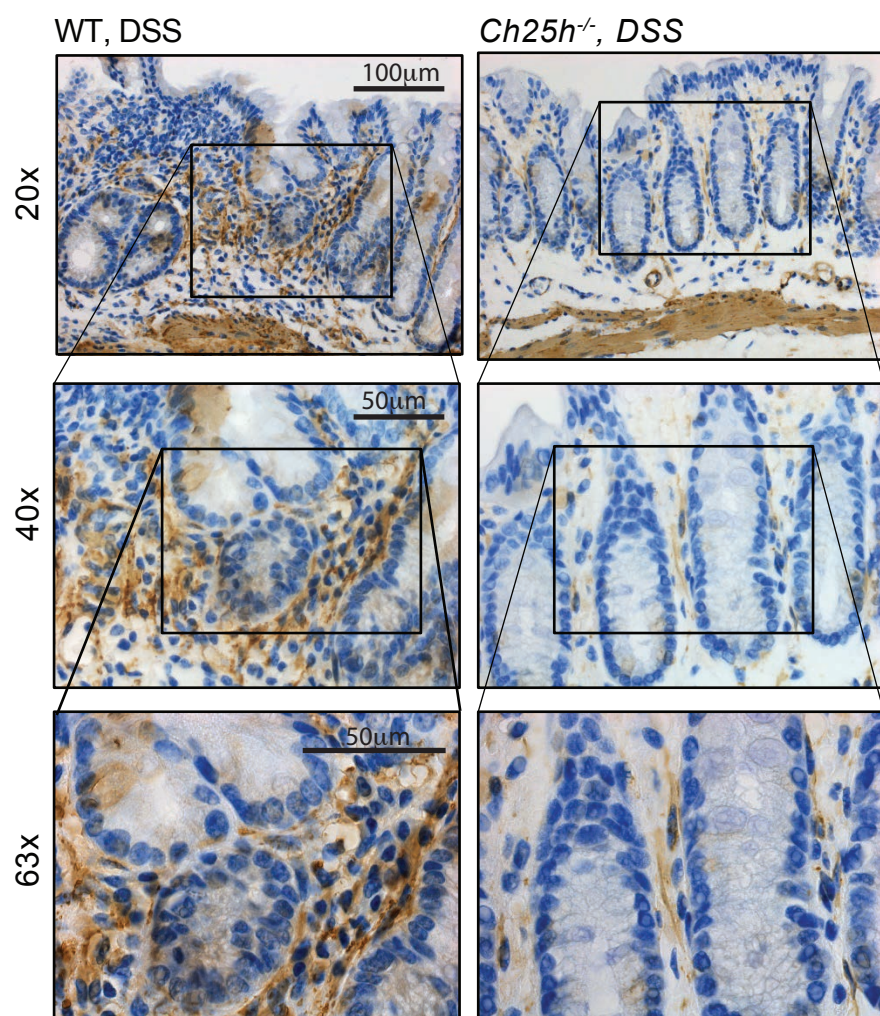

**Figure S2**

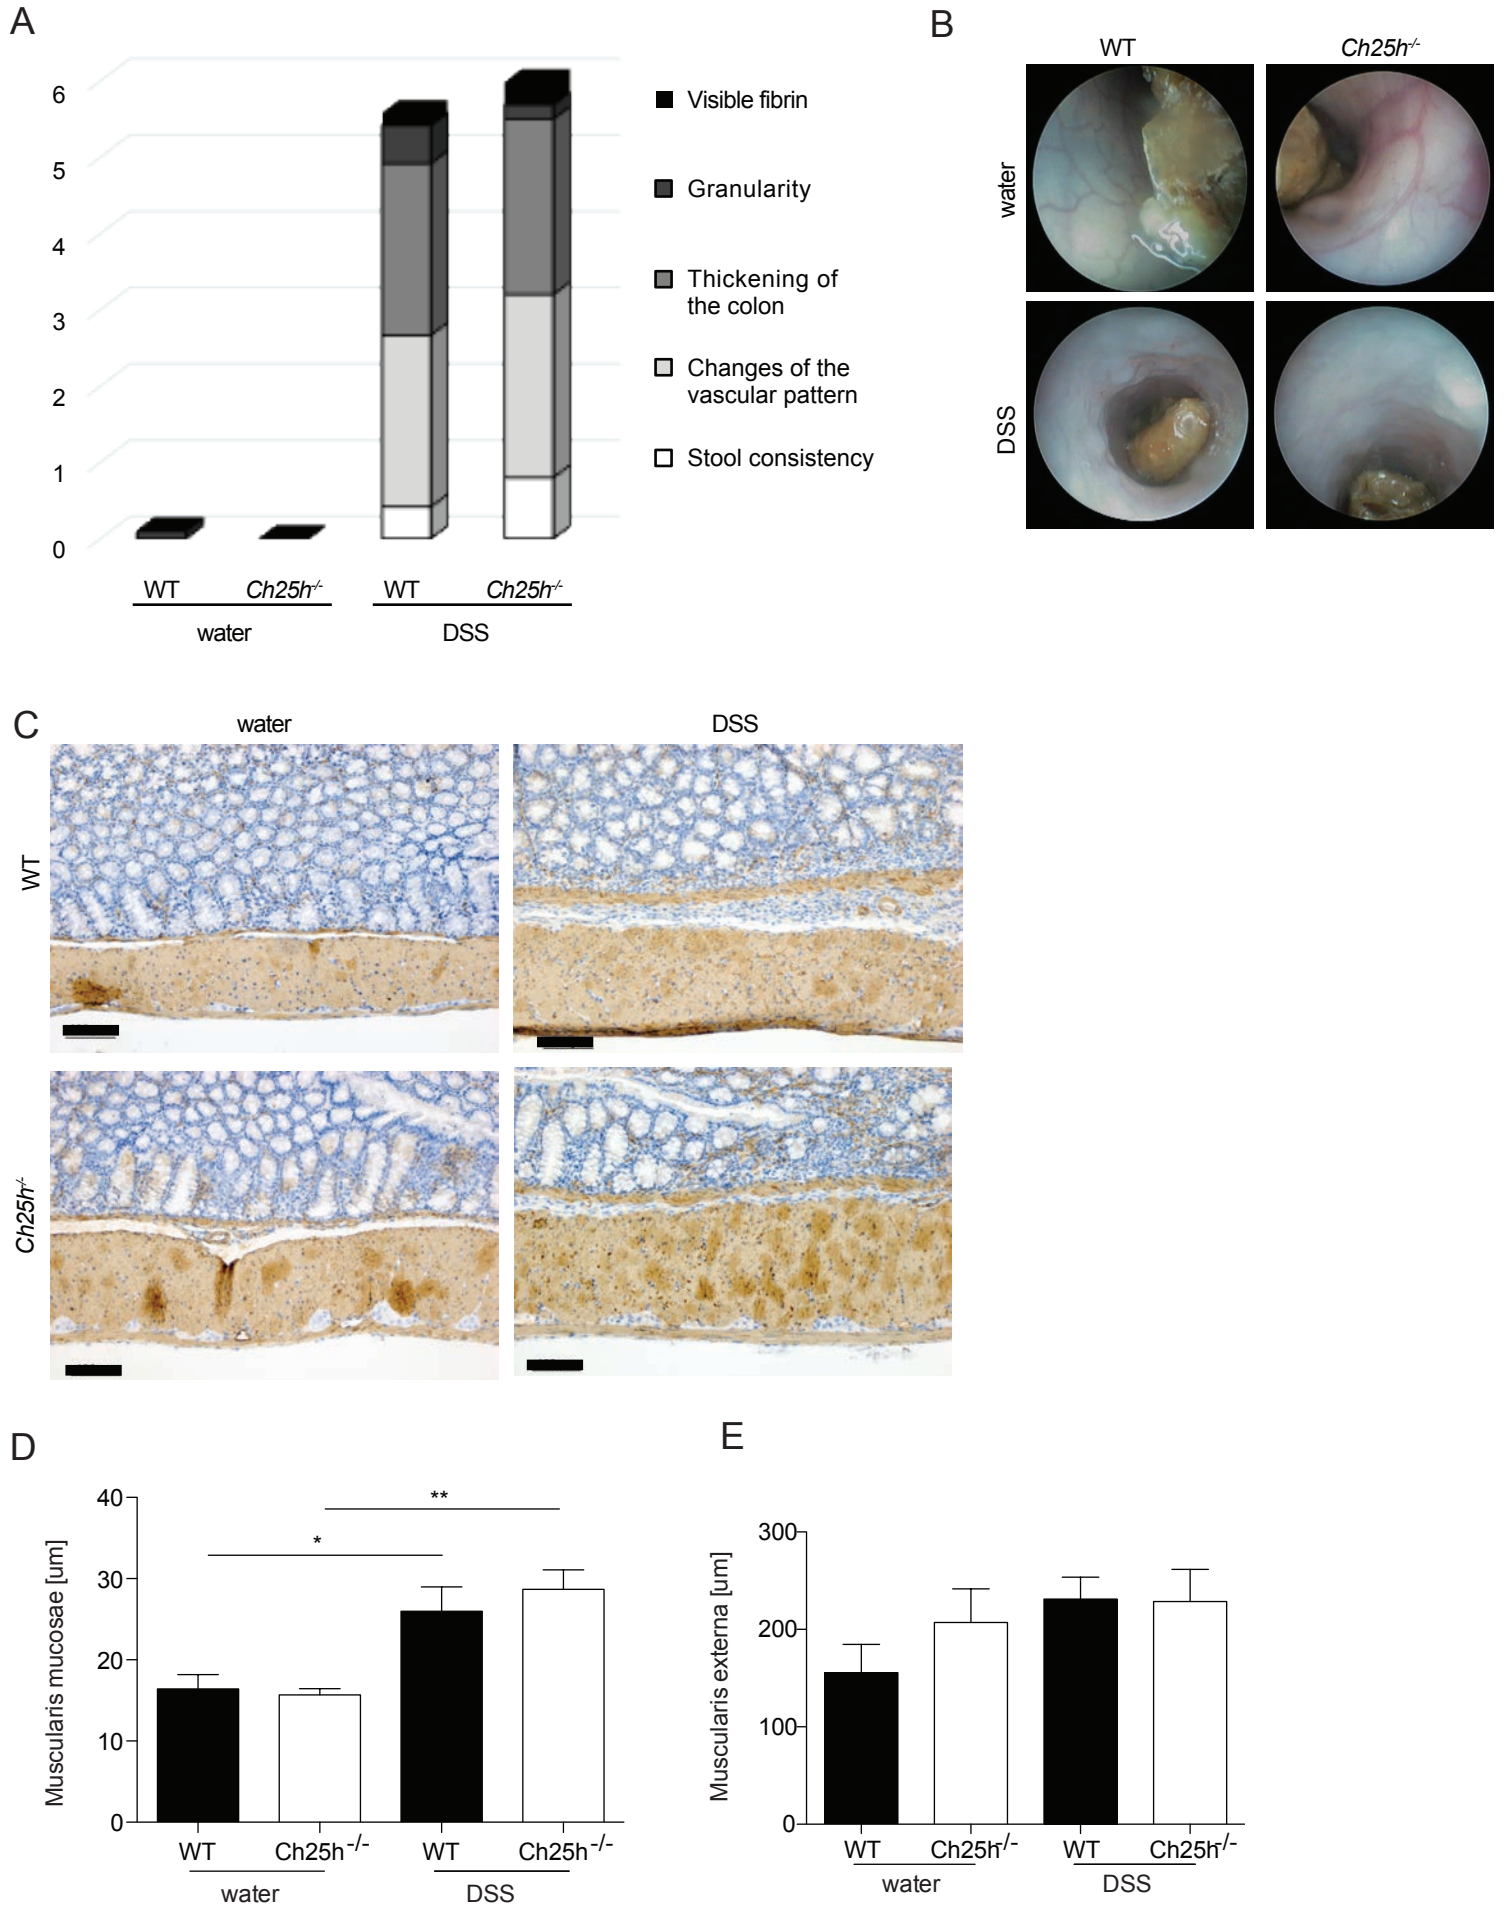

**Figure S3**

**A**

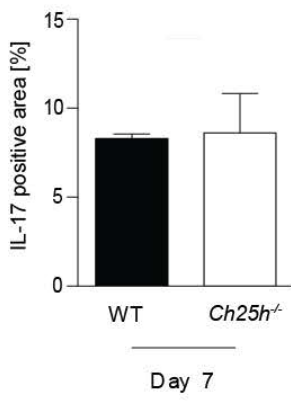

**B** WT

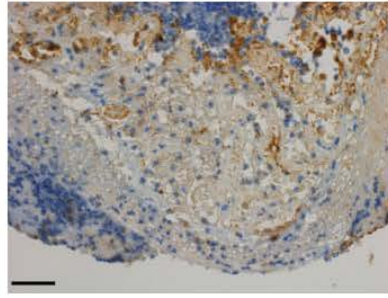

*Ch25h<sup>-/-</sup>*

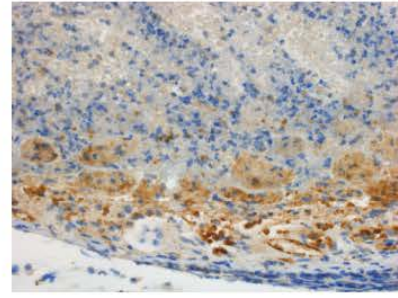

# Figure S4

A *Ch25h<sup>-/-</sup>*, day 0, Ch25h RNAscope

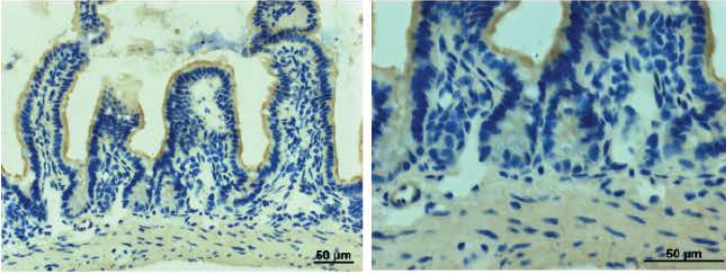

Supplement: jjz039_suppl_supplementary_figures_1-4.pdf [file jjz039_suppl_supplementary_figures_1-4.pdf]
